# Supplementary material
Source: Springer Nature journal article supplement (https://www.springermedizin.de/resource/supplementary/13014_2010_397_MOESM8_ESM.pdf/9633704)

**A**

SLGCs differentiating in FBS

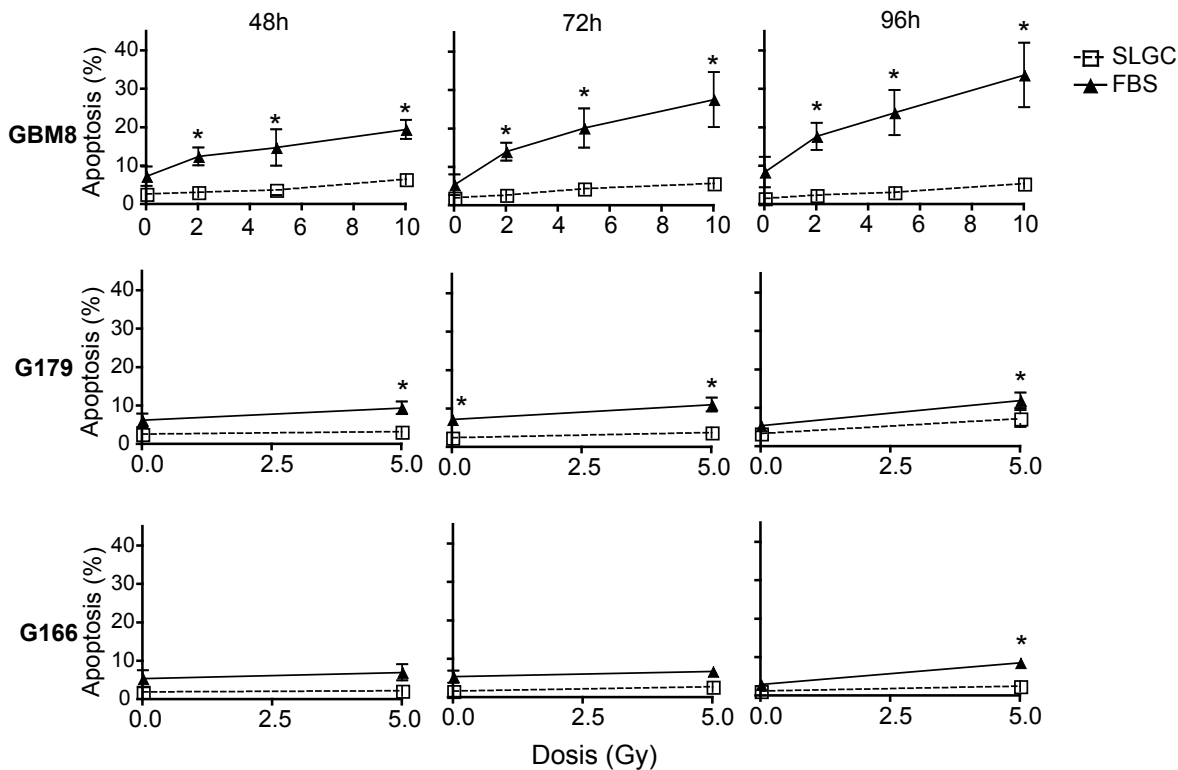**B**

SLGCs not differentiating in FBS

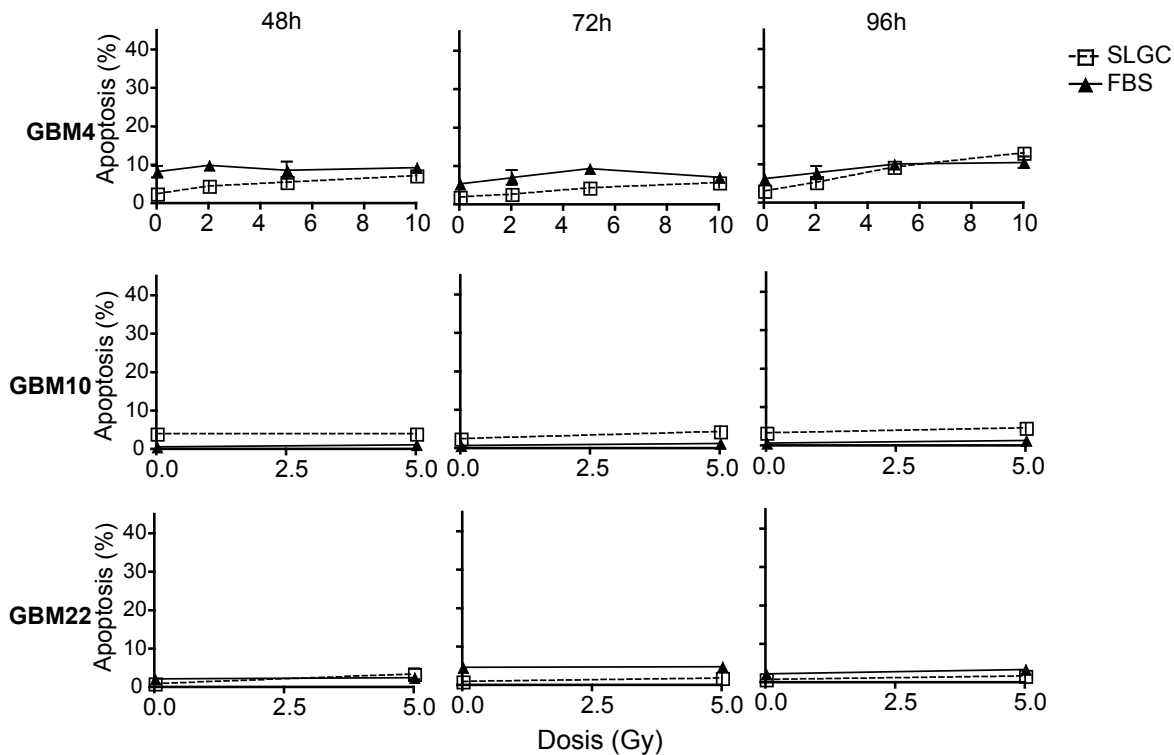

Supplement: MOESM8 [file 9633704]
